# Supplementary material for: Precursors for pyromellit-bridged silica sol–gel hybrid materials
Source: Royal Society of Chemistry journal article supplement (doi:10.1039/c2nj40538e), 2012-09-01
Supplement: c2nj40538e.pdf [file c2nj40538e.pdf]

*Electronic Supplementary Information (ESI)*

*for the manuscript entitled*

**“Precursors for pyromellitic-bridged silica sol-gel hybrid materials”**

S. Pfeifer, A. Schwarzer, D. Schmidt, E. Brendler, M. Veith, E. Kroke

Information on pyromellitic diimide **1** and dipotassium pyromellitic diimide **2**:

**Scheme 1:** Pyromellitic diimide **1** and dipotassium pyromellitic diimide **2**.

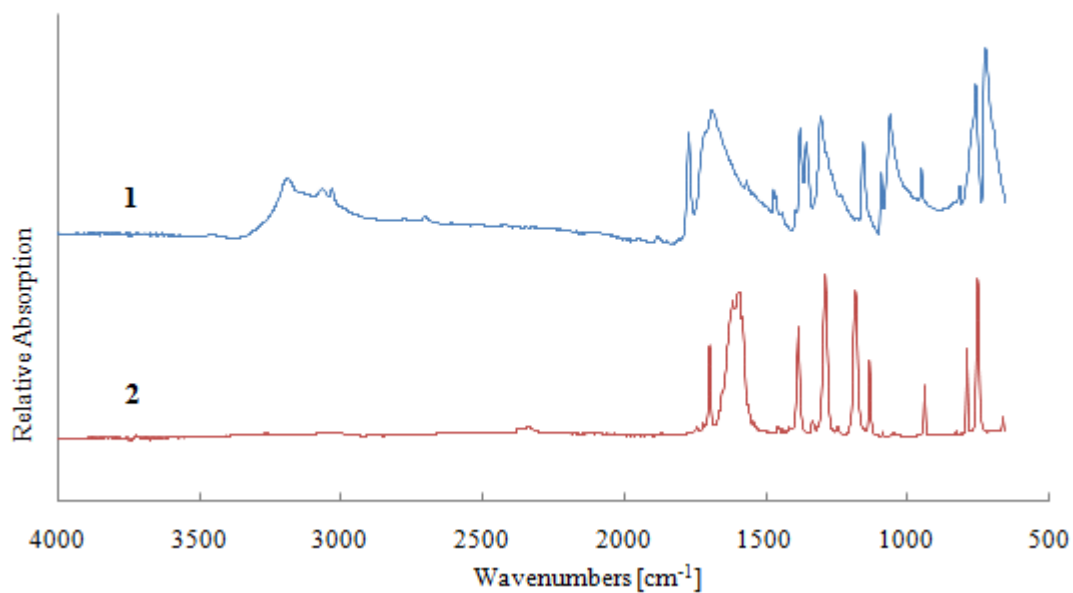

**Figure 1:** FT-IR of pyromellitic diimide **1** and dipotassium pyromellitic diimide **2**.

**Table 1:** Characteristic vibration of pyromellitic diimide and dipotassium pyromellitic diimide [ $\text{cm}^{-1}$ ].

| assignment | PMDI | $\text{K}_2\text{PMDI}$ |
|------------|------|-------------------------|
| NH         | 3197 | -                       |
| C=O        | 1771 | 1699                    |
| C=O        | 1712 | 1619                    |
| C=O        | 1694 | 1592                    |
| C-N        | 1306 | 1288                    |

**Table 2:**  $^1\text{H}$  and  $^{13}\text{C}$  NMR assignments of pyromellitic diimide **1** and dipotassium pyromellitic diimide

|  | $^1\text{H}$ [ppm] | $^{13}\text{C}$ [ppm]        |
|--|--------------------|------------------------------|
|  | 1;2                | 1 ; 2 ; 3                    |
|  | 8.10 ;<br>11.83    | 117.09;<br>137.78;<br>167.46 |
|  | 7.16               | 110.85;<br>142.45;<br>184.31 |

*Information on bis(trimethoxysilylpropyl)pyromellitic diimide*

3:

**Scheme 2:** Structure and atom labeling for bis(trimethoxysilylpropyl)pyromellitic diimide **3**.

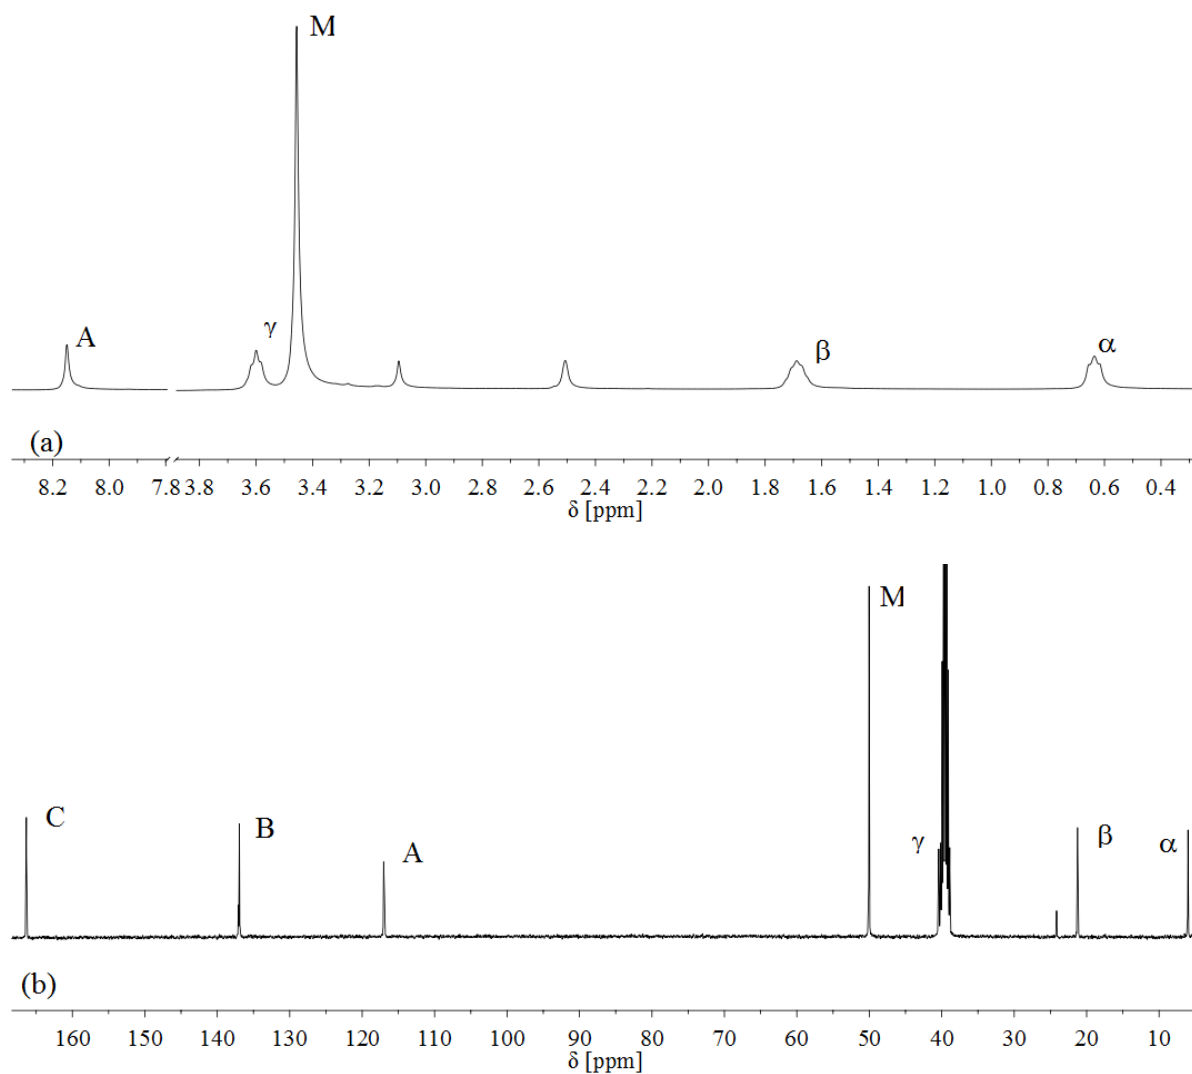

**Figure 2:** (a) <sup>1</sup>H and (b) <sup>13</sup>C NMR spectra of bis(trimethoxysilylpropyl)pyromellitic diimide.

**Table 3:** <sup>1</sup>H and <sup>13</sup>C NMR assignment of bis(trimethoxysilylpropyl)pyromellitic diimide.

|                 | M     | - | α    | β     | γ     | A      | B      | C      |
|-----------------|-------|---|------|-------|-------|--------|--------|--------|
| <sup>1</sup> H  | 3.46  | - | 0.64 | 1.69  | 3.60  | 8.15   | -      | -      |
| <sup>13</sup> C | 50.03 | - | 6.01 | 21.15 | 40.41 | 116.95 | 136.94 | 166.35 |

*Information on bis(triethoxysilylpropyl)pyromellitic diimide 4:*

**Scheme 3:** Structure and atom labeling for bis(triethoxysilylpropyl)pyromellitic diimide **4**.

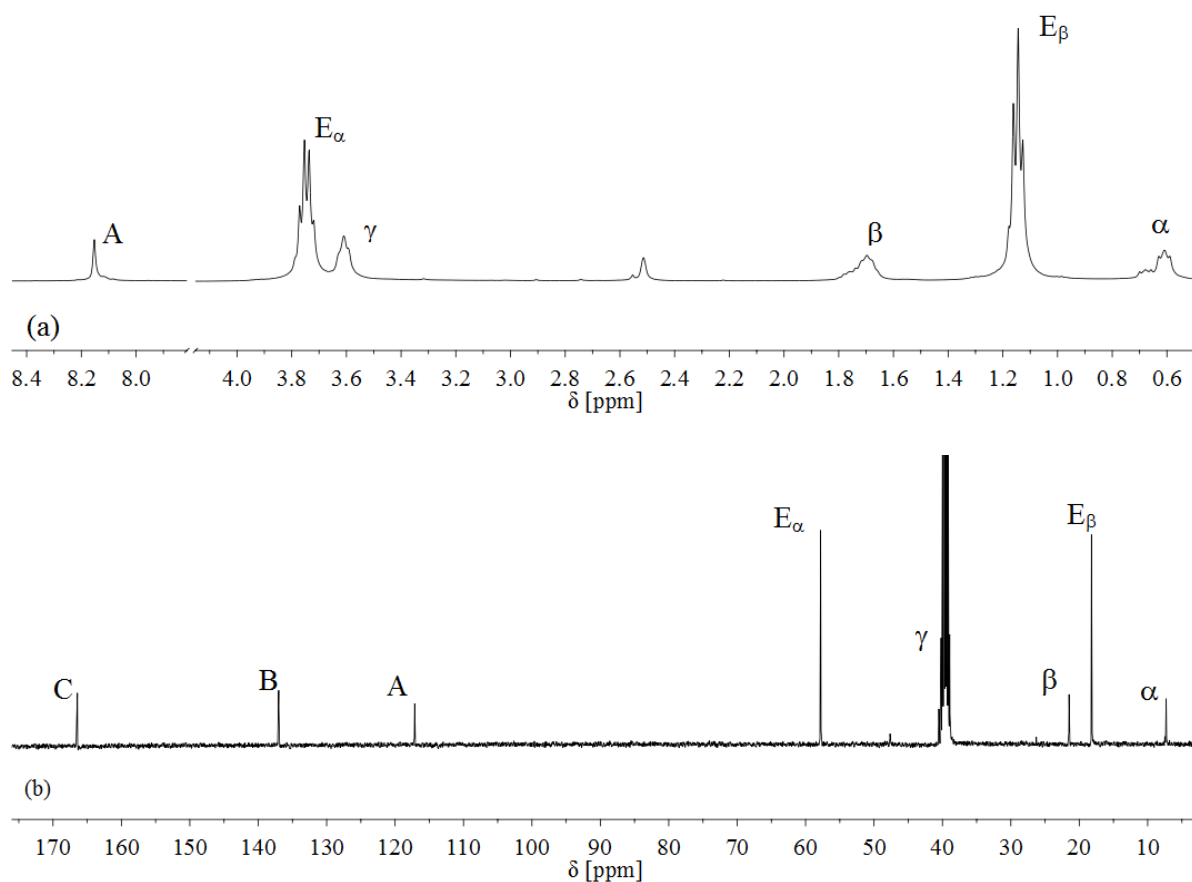

**Figure 3:** (a)  $^1\text{H}$  and (b)  $^{13}\text{C}$  NMR spectra of bis(triethoxysilylpropyl)pyromellitic diimide.

**Tabel 4:**  $^1\text{H}$  and  $^{13}\text{C}$  NMR assignment of bis(triethoxysilylpropyl)pyromellitic diimide.

|                 | $E_\alpha$ | $E_\beta$ | $\alpha$ | $\beta$ | $\gamma$ | A      | B      | C      |
|-----------------|------------|-----------|----------|---------|----------|--------|--------|--------|
| $^1\text{H}$    | 3.46       | 1.14      | 0.62     | 1.70    | 3.61     | 8.15   | -      | -      |
| $^{13}\text{C}$ | 57.76      | 18.17     | 7.25     | 21.44   | 40.47    | 117.08 | 136.96 | 166.38 |

Information on bis(triethoxysilylethyl)pyromellitic diimide **5**:

**Scheme 4:** Structure and atom labeling for bis(triethoxysilylethyl)pyromellitic diimide **5**.

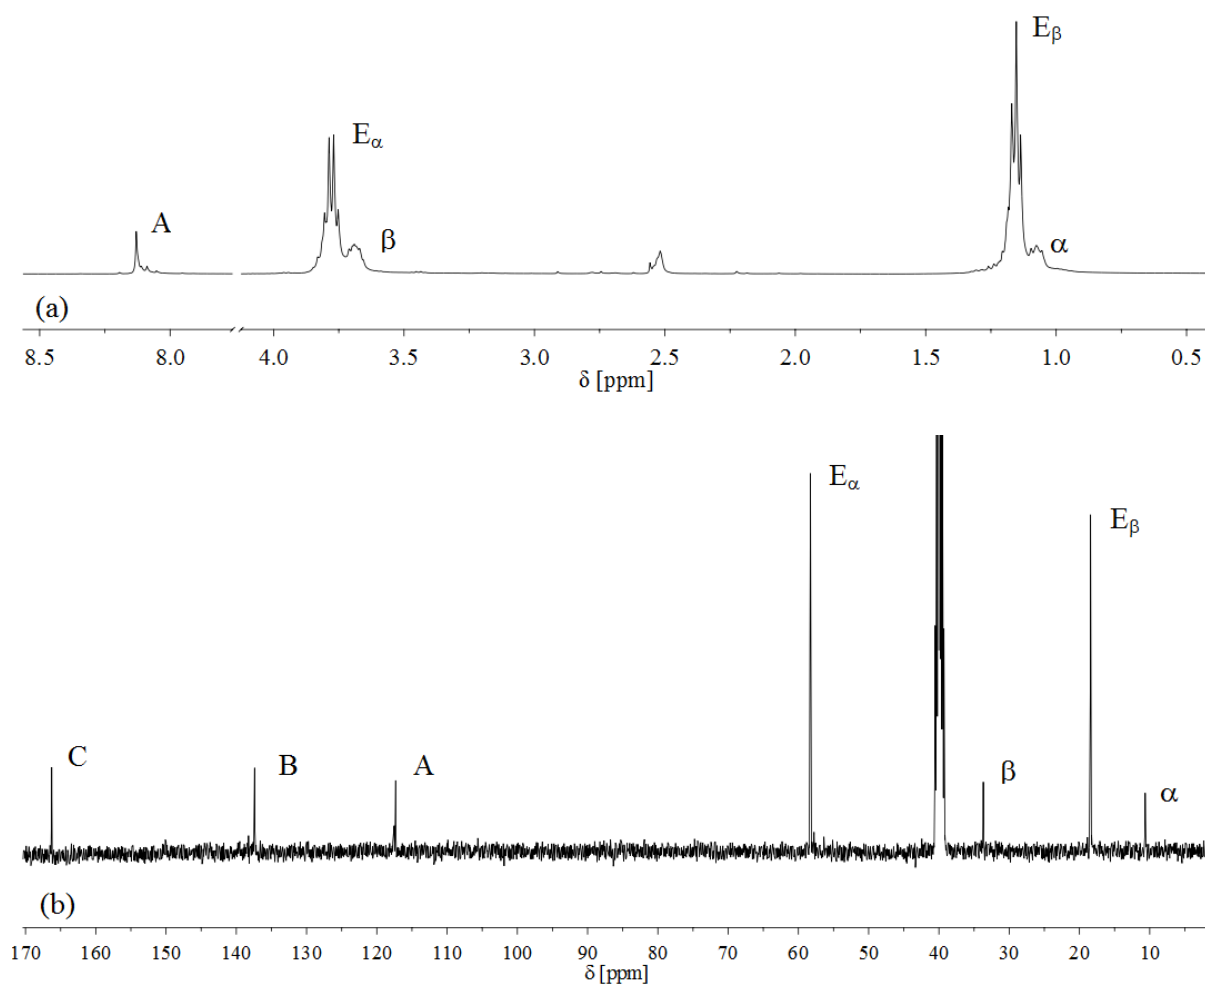

**Figure 4:** (a)  $^1\text{H}$  and (b)  $^{13}\text{C}$  NMR spectra of bis(triethoxysilylethyl)pyromellitic diimide.

**Table 5:**  $^1\text{H}$  and  $^{13}\text{C}$  NMR assignment of bis(triethoxysilylethyl)pyromellitic diimide.

|                 | $\text{E}_\alpha$ | $\text{E}_\beta$ | $\alpha$ | $\beta$ | $\gamma$ | A      | B      | C      |
|-----------------|-------------------|------------------|----------|---------|----------|--------|--------|--------|
| $^1\text{H}$    | 3.77              | 1.15             | 1.08     | 3.69    | -        | 8.13   | -      | -      |
| $^{13}\text{C}$ | 57.89             | 18.02            | 10.24    | 33.29   | -        | 116.92 | 136.99 | 165.87 |

*Information on bis(triethoxysilylmethyl)pyromellitic diimide*

6:

**Scheme 5:** Structure and atom labeling for bis(triethoxysilylmethyl)pyromellitic diimide **6**.

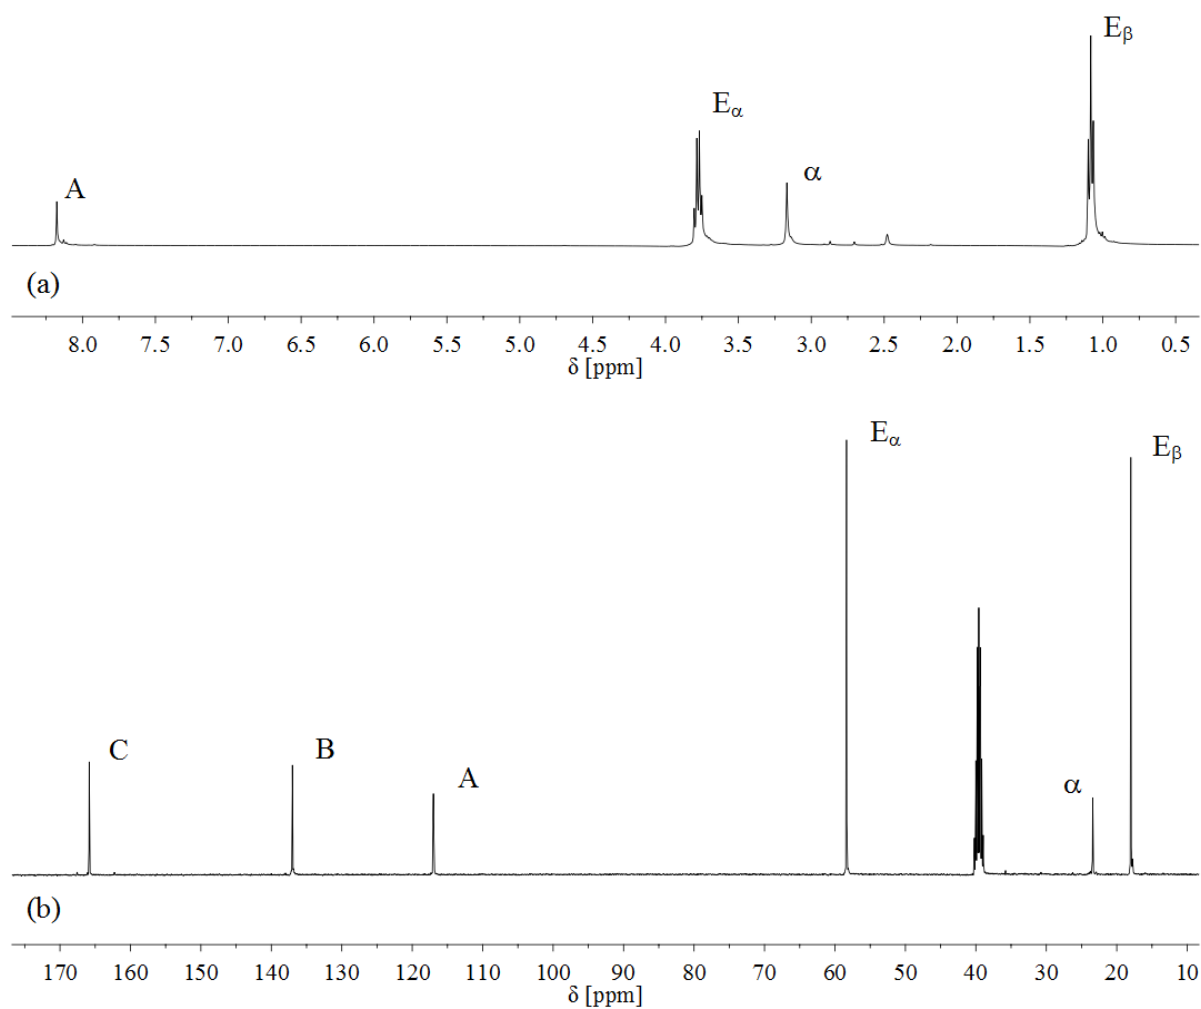

**Figure 5:** (a)  $^1\text{H}$  and (b)  $^{13}\text{C}$  NMR spectra of bis(triethoxysilylmethyl)pyromellitic diimide.

**Tabel 6:**  $^1\text{H}$  and  $^{13}\text{C}$  NMR assignment of bis(triethoxysilylmethyl)pyromellitic diimide.

|                 | $E_\alpha$ | $E_\beta$ | $\alpha$ | $\beta$ | $\gamma$ | A      | B      | C      |
|-----------------|------------|-----------|----------|---------|----------|--------|--------|--------|
| $^1\text{H}$    | 3.81       | 1.13      | 3.21     | -       | -        | 8.22   | -      | -      |
| $^{13}\text{C}$ | 58.30      | 17.94     | 23.35    | -       | -        | 116.94 | 136.95 | 165.79 |
